# Supplementary material for: Screening for osteogenic activity in extracts from Irish marine organisms: The potential of Ceramium pallidum
Source: PLoS One. 2018 Nov 28;13(11):e0207303. doi: 10.1371/journal.pone.0207303 (PMC6261572; doi:10.1371/journal.pone.0207303)
Supplement: S1 Dataset — Datasets are labelled according to the extracts tested, the type of data (i.e. in vitro or in vivo), time-point used and which figure the data relates to. (XLSX) [file pone.0207303.s008.xlsx]

## Sheet: Sheet1
DMSO extracts, proliferation data, day 7, used in fig 2 (a)
DMSO Exp 1	D-01	D-08	D-09	DMSO Exp 2	D-15	D-17	D-20	D-21	D-24	D-25	D-26	D-27	D-28	DMSO Exp 3	D-32	D-33	D-34	D-36	D-37	D-39	D-40
109.029	71.3846	101.933	66.4167	100.121	93.033	72.6964	76.9297	77.2774	64.2764	96.4065	124.51	73.7205	70.985	102.724	80.2027	118.511	87.2257	115.77	130.454	91.1408	115.411
104.454	64.3478	98.8233	58.411	95.7137	96.9678	69.0464	77.2404	70.6304	69.1504	74.9732	72.5047	57.0339	86.3792	98.8951	77.7502	139.37	100.56	86.4727	107.907	99.0208	114.764
81.537	74.5001	79.0718	69.6817	115.093	110.563	53.5906	74.4968	84.2913	67.8073	59.6927	80.5811	45.8059	71.226	95.6101	84.6521	128.502	104.495	129.898	105.843	79.6522	100.35
104.98	80.4356	98.72	74.6302	89.0722	129.855	64.2176	87.7565	107.053	83.9874	82.4047	64.731	79.8089	74.3653	102.77	86.8921	127.322	104.95	122.124	120.222	110.599	79.6341
DMSO extracts, differentation data, day 7, used in fig 2 (b)
DMSO	D-01	D-08	D-09	D-15	D-17	D-20	D-21	D-24	D-25	D-26	D-27	D-28	D-32	D-33	D-34	D-36	D-37	D-39	D-40
436.271	237.267	344.462	205.42	461.82	297.791	392.481	74.5883	85.1464	191.517	461.516	282.569	340.496	234.658	263.399	249.056	245.586	185.352	256.813	227.112
256.643	211.238	350.131	147.048	362.983	375.957	482.156	129.976	131.256	305.491	361.967	285.475	288.283	214.241	210.218	345.074	268.925	481.773	291.574	314.525
268.354	261.321	273.378	191.619	315.187	241.565	432.749	144.038	209.848	353.865	392.052	298.679	287.578	229.837	337.298	281.571	228.005	400.504	389.711	271.555
260.82
356.391
310.253
Ethanol extracts, proliferation data, day 7, used in fig 2 (c)
E-04			E-05			E-10			E-11			EtOH Exp 2			E-17			E-19			E-20			E-21			E-22			E-24			E-25
Mean	SD	n	Mean	SD	n	Mean	SD	n	Mean	SD	n	Mean	SD	n	Mean	SD	n	Mean	SD	n	Mean	SD	n	Mean	SD	n	Mean	SD	n	Mean	SD	n	Mean	SD	n
64.7614	18.6149	4	113.332	15.2938	4	100.305	9.43055	4	101.182	2.72641	4	100	4.58741	4	78.9561	10.3457	4	81.5273	9.39565	4	17.9686	17.6268	4	93.9288	3.648	4	93.6681	3.37588	4	34.6569	6.958	4	89.954	3.70279	4
Ethanol extracts, differentiation data, day 7, used in fig 2 (d)
EtOH			E-01			E-04			E-05			E-10			E-11			E-17			E-19			E-20			E-21			E-22			E-24			E-25
Mean	SD	n	Mean	SD	n	Mean	SD	n	Mean	SD	n	Mean	SD	n	Mean	SD	n	Mean	SD	n	Mean	SD	n	Mean	SD	n	Mean	SD	n	Mean	SD	n	Mean	SD	n	Mean	SD	n
177.642	42.2889	4	89.4106	60.6191	4	77.221	19.6753	4	238.459	41.816	4	177.905	22.3509	4	94.2983	22.0232	4	51.7017	15.598	4	170.407	62.2942	4	80.2335	29.5906	4	56.3785	24.4646	4	84.1534	28.2531	4	87.3525	73.1409	4	35.2888	24.9298	4
Powder extracts, proliferation data, day 7, used in fig 2 (e)
Saline			P-01 1%			P-01 5%			P-01 10%			P-02 1%			P-02 5%			P-02 10%			P-03 1%			P-03 5%			P-03 10%			P-04 1%			P-04 5%			P-04 10%			P-05 1%			P-05 5%
Mean	SD	n	Mean	SD	n	Mean	SD	n	Mean	SD	n	Mean	SD	n	Mean	SD	n	Mean	SD	n	Mean	SD	n	Mean	SD	n	Mean	SD	n	Mean	SD	n	Mean	SD	n	Mean	SD	n	Mean	SD	n	Mean	SD	n
100	2.04675	9	99.2782	1.3882	3	97.4925	1.30343	3	89.9073	1.40789	3	102.642	2.10489	3	101.114	1.99276	3	83.3865	0.977863	3	101.508	1.54116	3	101.104	2.046	3	99.2094	2.00297	3	100.214	1.8731	3	98.5662	1.69008	3	95.5363	1.92519	3	99.145	1.58417	3	80.4306	3.35839	3
Powder extracts, differentiation data, day 7, used in fig 2 (f)
Saline	P-01 1%	P-01 5%	P-01 10%	P-02 1%	P-02 5%	P-02 10%	P-03 1%	P-03 5%	P-03 10%	P-04 1%	P-04 5%	P-04 10%	P-05 1%	P-05 5%
167.818	214.009	165.733	196.515	231.149	368.476	364.752	190.167	231.148	126.436	258.95	458.828	432.772	162.164	127.56
189.048	150.537	135.46	209.869	336.066	368.374	295.159	196.27	216.539	104.668	255.265	485.969	437.616	121.252	108.686
213.778	198.339	191.08	229.651	230.055	403.884	285.409	173.371	249.389	130.085	222.171	473.145	436.725	138.935	111.56
163.239													123.805	109.237
214.246
288.029
193.657
222.127
245.796
Ceramium pallidum in vitro, proliferation data, day 1, used in fig 3 (a)								Ceramium pallidum in vitro, proliferation data, day 1, used in fig 3 (b)								Ceramium pallidum in vitro, proliferation data, day 1, used in fig 3 (c)
Control	15 (ug/ml)	75	150	760	1520			Control	15	75	150	760	1520			Control	15	75	150	760	1520
0.305519	0.37889	0.368296	0.349427	0.303471	0.206638			0.316975	0.335029	0.317126	0.317234	0.314364	0.130029			0.451816	0.368084	0.443501	0.436926	0.424916	0.267395
0.353205	0.332001	0.356441	0.322613	0.288696	0.189105			0.33765	0.314808	0.324126	0.314363	0.321985	0.118251			0.388745	0.394405	0.407075	0.445847	0.387251	0.290868
0.305896	0.307939	0.312545	0.310231	0.298304	0.13514			0.321941	0.304191	0.285637	0.293649	0.31083	0.130302			0.38319	0.383837	0.411522	0.457646	0.409525	0.24568
0.300544	0.32686	0.319718	0.285744	0.255521	0.137217			0.292656	0.302754	0.292804	0.303978	0.306571	0.176895			0.39453	0.369676	0.41551	0.449695	0.39574	0.270541
0.312865								0.324763								0.466796
0.348377								0.307545								0.466031
0.348083								0.30104								0.453166
0.32159								0.304956								0.4275
0.318181								0.323177								0.426104
0.338935								0.31705								0.409713
0.348924								0.297878								0.395007
0.340831								0.303696								0.382304
0.307876								0.333099								0.470202
0.307433								0.34836								0.417811
0.348648								0.319046								0.421588
0.322559								0.317078								0.421637
0.301959								0.35304								0.481232
0.294317								0.366187								0.436909
0.304337								0.352449								0.418964
0.363217								0.327356								0.425449
Ceramium pallidum in vitro, differentiation data, day 7, used in fig 3 (d)
Control	15	75	150	760	1520
621.547	662.999	824.359	1864.46	807.341	0
870.459	1209.44	740.105	2002.69	1058.72	0
621.808	1459.1	1257.21	2819.15	760.432	0
1119.53	1188.41	604.299	929.893	297.7	0
346.554
575.997
797.688
799.639
676.208
577.167
889.244
1376.42
566.231
828.648
860.394
998.212
601.334
994.693
787.772
1126.48
Ceramium pallidum in vitro, mineralisation data, day 21, used in fig 3 (d)
Control	15	75	150	300
0.398059	1.28744	1.34922	2.62816	1.50149
0.467977	1.09409	1.33381	2.19726	1.34462
0.462321	1.40507	1.49088	2.14237	1.27043
0.599815	1.59599	1.35821	3.16693	1.70364
0.445867
0.510265
0.465374
0.543562
0.385651
0.435741
0.482781
0.525046
0.45393
0.458741
0.463579
0.501294
C. pallidum in vivo operculum data, 6 dpf, used in fig 4 (e)
Control	30	150	760	1520	EtOH 0.2%	Calcitriol 20pg/ml
106.871	129.36	167.863	199.928	185.491	91.1481	148.834
81.4431	169.545	189.127	203.101	178.978	94.8816	140.995
129.173	168.422	129.42	229.097	160.204	78.4031	245.08460*
94.0066	139.795	159.161	253.616	181.546	81.4753	89.3446
126.368	127.635		139.605	186.216	112.051	119.084
70.6127	167.854		138.692	185.584	83.3206	90.7193
98.6634	123.632		173.646	163.945	104.728	132.377
102.133	141.768		145.446	240.408	142.734	115.985
103.427	189.304		173.076	199.775	96.3164	176.335
94.5336	135.329		181.234	146.47	90.5758	95.5078
92.7689	126.511		213.05	179.067	64.8632	84.811
	162.555		168.746	163.159	115.858	152.625
			191.004	149.661	87.3899	138.405
			195.499		145.588	146.224
					110.667	182.665
C. pallidum in vivo caudal fin data, scatterplot, used in fig 5 (b)
Categories	Control	C. pallidum
7	1.97038	2.79659
8	6.53347	5.11162
9	9.7491	5.57971
10	15.9397	7.24237
11	20.8273	10.414
12	17.7562	12.5355
13	12.15	12.8847
14	6.90937	12.5697
15	3.62797	10.013
16	1.96134	6.9929
17	1.00394	4.82423
18	0.591202	3.11705
19	0.368789	2.03521
20	0.20835	1.31775
21	0.145303	0.836277
22	0.0977165	0.533894
23	0.057959	0.355938
24	0.03486	0.2423
25	0.0236756	0.172688
26	0.0171096	0.15152
27	0.00707884	0.112107
28	0.00854481	0.077215
29	0.00401991	0.054733
30	0.00658892	0.029026
C. pallidum in vivo caudal fin, average percentage frequency values, used in fig (e)
Control	C. pallidum		Control	C. pallidum
13.3175	12.3233		0.955733	1.85157
12.5436	5.82572		1.68195	8.31527
11.9076	8.69592		2.32875	5.15969
10.4671	9.66071		3.66933	4.57035
12.4258	3.89756		1.84349	9.29585
C. pallidum in vivo caudal fin, oseteogenesis values, used in fig (f)
Control	C. pallidum
14.382	15.0944
14.8466	16.199
14.9379	21.7397
15.4705	14.6045
13.6063	17.9059
C. pallidum in vivo caudal fin, oseteogenesis values, used in fig (g)
Control	C. pallidum
387.945	231.496
236.288	275.773
238.151	262.731
277.433	321.038
283.646	245.032
DMSO extracts 01-14, proliferation, day 4, used in S1 fig (a)
DMSO	D-01	D-02	D-03	D-04	D-05	D-06	D-07	D-08	D-09	D-10	D-11	D-12	D-13	D-14
102.77	81.3406	92.8605	71.3913	93.5645	85.2643	113.737	82.8196	93.2598	73.7932	119.484	100.501	120.154	104.928	97.1407
107.662	73.6054	89.3508	67.8831	92.9344	59.3064	96.419	85.0884	92.6031	47.9536	119.546	111.512	115.678	109.949	81.4056
100.72	69.3429	121.748	82.1451	106.065	134.588	73.1913	87.7047	88.4486	73.2475	108.486	116.372	63.7745	99.1004	109.366
88.848	68.4866	85.2392	114.793	115.787	87.7165	111.259	91.6359	95.5656	64.2463	92.8013	130.792	67.2087	83.8238	103.96
DMSO extracts 01-14, proliferation, day 7, used in S1 fig (b)
DMSO	D-01	D-02	D-03	D-04	D-05	D-06	D-07	D-08	D-09	D-10	D-11	D-12	D-13	D-14
109.029	71.3846	114.796	99.4323	103.829	115.422	100.633	105.931	101.933	66.4167	108.079	90.5284	94.7014	104.928	91.2614
104.454	64.3478	73.0815	83.4332	84.1078	99.7107	84.4847	109.835	98.8233	58.411	65.302	73.8036	74.0613	91.9737	75.9515
81.537	74.5001	93.735	67.146	93.2585	107.015	112.801	84.9393	79.0718	69.6817	84.949	62.708	85.8376	97.6759	103.173
104.98	80.4356	101.636	104.087	120.34	104.822	100.335	87.1297	98.72	74.6302	91.5191	93.8639	111.994	93.7302	91.9433
DMSO extracts 15-28, proliferation, day 4, used in S2 fig (a)
DMSO	D-15	D-16	D-17	D-18	D-19	D-20	D-21	D-22	D-23	D-24	D-25	D-26	D-27	D-28
85.3359	73.0154	75.1301	83.4878	78.8428	79.275	74.6466	61.6007	103.282	86.3278	87.8116	78.2069	77.4932	73.4625	57.7589
108.596	105.815	89.0652	94.9257	91.4133	99.2726	69.6521	76.1552	98.6251	90.7807	74.8006	81.9759	90.0968	84.7712	65.8069
92.445	115.705	104.083	98.7063	107.13	89.1662	64.507	70.7401	86.255	66.4329	55.5034	73.7242	84.7414	81.234	59.8554
113.623	116.404	92.811	41.5816	84.7033	58.6796	77.4948	79.1227	73.8699	89.355	63.3627	77.1885	74.9032	84.5526	83.0391
DMSO extracts 15-28, proliferation, day 7, used in S2 fig (b)
DMSO	D-15	D-16	D-17	D-18	D-19	D-20	D-21	D-22	D-23	D-24	D-25	D-26	D-27	D-28
100.121	93.033	99.873	72.6964	64.056	88.5506	76.9297	77.2774	76.5682	110.243	64.2764	96.4065	124.51	73.7205	70.985
95.7137	96.9678	86.1916	69.0464	85.6823	86.7256	77.2404	70.6304	99.4828	72.5431	69.1504	74.9732	72.5047	57.0339	86.3792
115.093	110.563	93.1932	53.5906	108.712	95.2304	74.4968	84.2913	85.57	79.3283	67.8073	59.6927	80.5811	45.8059	71.226
89.0722	129.855	131.966	64.2176	101.784	92.536	87.7565	107.053	90.6083	89.1009	83.9874	82.4047	64.731	79.8089	74.3653
DMSO extracts 29-43, proliferation, day 4, used in S3 fig (a)
DMSO	D-29	D-30	D-31	D-32	D-33	D-34	D-35	D-36	D-37	D-38	D-39	D-40	D-41	D-42	D-43
124.572	162.176	171.533	149.525	155.383	171.211	206.394	139.511	203.226	181.16	176.779	163.476	137.886	190.355	107.054	74.0186
117.023	160.25	193.568	133.581	156.257	132.18	115.712	121.765	149.532	140.399	155.141	140.583	127.008	105.922	128.111	46.5639
70.2971	155.325	136.437	142.558	143.082	123.67	96.5312	156.52	193.909	116.647	125.166	136.812	95.6538	96.8182	135.68	51.995
88.1078	169.462	172.961	155.325	199.543	120.843	147.98	164.947	181.987	190.968	181.989	114.257	90.0449	110.854	171.751	62.6004
DMSO extracts 29-43, proliferation, day 7, used in S3 fig (b)
DMSO	D-29	D-30	D-31	D-32	D-33	D-34	D-35	D-36	D-37	D-38	D-39	D-40	D-41	D-42	D-43
102.724	95.611	109.127	102.786	80.2027	118.511	87.2257	98.4467	115.77	130.454	130.849	91.1408	115.411	130.22	117.618	119.216
98.8951	86.7258	92.8556	92.6595	77.7502	139.37	100.56	121.174	86.4727	107.907	88.4298	99.0208	114.764	141.081	130.256	126.739
95.6101	88.7389	115.151	111.261	84.6521	128.502	104.495	139.34	129.898	105.843	136.647	79.6522	100.35	116.704	94.1375	128.802
102.77	116.68	123.9	125.324	86.8921	127.322	104.95	135.607	122.124	120.222	133.056	110.599	79.6341	112.287	135.696	134.78
DMSO extracts 01-14, cytotoxicity, day 1, used in S4 fig (a)
Positive			DMSO			D-01			D-02			D-03			D-04			D-05			D-06			D-07			D-08			D-09			D-10			D-11			D-12			D-13			D-14
Mean	SD	n	Mean	SD	n	Mean	SD	n	Mean	SD	n	Mean	SD	n	Mean	SD	n	Mean	SD	n	Mean	SD	n	Mean	SD	n	Mean	SD	n	Mean	SD	n	Mean	SD	n	Mean	SD	n	Mean	SD	n	Mean	SD	n	Mean	SD	n
0.50235	0.012101	4	0.089713	0.008789	4	0.069338	0.015054	4	0.07055	0.008521	4	0.074375	0.009971	4	0.066925	0.012551	4	0.066688	0.005909	4	0.0721	0.011961	4	0.076063	0.006797	4	0.089125	0.013448	4	0.069538	0.010814	4	0.072225	0.008344	4	0.093325	0.008693	4	0.072725	0.005763	4	0.063425	0.0069	4	0.059975	0.003699	4
DMSO extracts 01-14, cytotoxicity, day 1, used in S4 fig (b)
Positive			DMSO			D-15			D-16			D-17			D-18			D-19			D-20			D-21			D-22			D-23			D-24			D-25			D-26			D-27			D-28
Mean	SD	n	Mean	SD	n	Mean	SD	n	Mean	SD	n	Mean	SD	n	Mean	SD	n	Mean	SD	n	Mean	SD	n	Mean	SD	n	Mean	SD	n	Mean	SD	n	Mean	SD	n	Mean	SD	n	Mean	SD	n	Mean	SD	n	Mean	SD	n
0.458563	0.008273	4	0.072025	0.003563	4	0	0	4	0.009738	0.004254	4	0.018838	0.005765	4	0.011013	0.009153	4	0	0	4	0.013913	0.006209	4	0.029088	0.009997	4	0.019788	0.003625	4	0.013625	0.003257	4	0.001788	0.00145	4	0.011788	0.009932	4	0.00085	0.001131	4	0	0	4	0.015225	0.003728	4
DMSO extracts 01-14, cytotoxicity, day 1, used in S4 fig (c)
Positive			DMSO			D-29			D-30			D-31			D-32			D-33			D-34			D-35			D-36			D-37			D-38			D-39			D-40			D-41			D-42			D-43
Mean	SD	n	Mean	SD	n	Mean	SD	n	Mean	SD	n	Mean	SD	n	Mean	SD	n	Mean	SD	n	Mean	SD	n	Mean	SD	n	Mean	SD	n	Mean	SD	n	Mean	SD	n	Mean	SD	n	Mean	SD	n	Mean	SD	n	Mean	SD	n	Mean	SD
0.527575	0.063039	4	0.121838	0.011473	4	0.00675	0.010369	4	0.003525	0.004269	4	0.023288	0.005847	4	0.0162	0.008394	4	0.011438	0.007449	4	0.005281	0.00777	4	0.0137	0.00583	4	0.011338	0.002022	4	0.003212	0.004461	4	0.001487	0.002975	4	0.011225	0.009463	4	0.007087	0.007237	4	0.007912	0.00559	4	0.002	0.003835	4	0.007025	0.007694
Ethanol extracts E01-E13, proliferation, day 4, used in S5 fig (a)
EtOH			E-01			E-02			E-03			E-04			E-05			E-06			E-07			E-08			E-09			E-10			E-11			E-12			E-13
Mean	SD	n	Mean	SD	n	Mean	SD	n	Mean	SD	n	Mean	SD	n	Mean	SD	n	Mean	SD	n	Mean	SD	n	Mean	SD	n	Mean	SD	n	Mean	SD	n	Mean	SD	n	Mean	SD	n	Mean	SD	n
100	23.5944	4	88.5506	4.67636	4	88.5567	17.7039	4	122.83	4.76006	4	80.6651	2.25866	4	121.25	3.84619	4	38.1861	3.32138	4	111.3	19.5122	4	23.5228	10.9751	4	128.488	3.88511	4	133.127	6.08085	4	132.062	10.237	4	127.425	5.55619	4	143.328	37.8266	4
Ethanol extracts E01-E13, proliferation, day 7, used in S5 fig (b)
EtOH			E-01			E-02			E-03			E-04			E-05			E-06			E-07			E-08			E-09			E-10			E-11			E-12			E-13
Mean	SD	n	Mean	SD	n	Mean	SD	n	Mean	SD	n	Mean	SD	n	Mean	SD	n	Mean	SD	n	Mean	SD	n	Mean	SD	n	Mean	SD	n	Mean	SD	n	Mean	SD	n	Mean	SD	n	Mean	SD	n
100	5.11666	4	55.313	0.918387	4	93.7009	5.83917	4	100.171	2.23993	4	64.7614	12.0552	4	113.332	17.3327	4	6.86143	1.94889	4	92.8051	5.10232	4	7.2185	2.01645	4	99.3234	3.50477	4	100.305	9.45936	4	101.182	2.75865	4	92.0458	3.95588	4	98.799	4.24171	4
Ethanol extracts E14-E25, proliferation, day 7, used in S6 fig (a)
EtOH			E-14			E-15			E-16			E-17			E-18			E-19			E-20			E-21			E-22			E-23			E-24			E-25
Mean	SD	n	Mean	SD	n	Mean	SD	n	Mean	SD	n	Mean	SD	n	Mean	SD	n	Mean	SD	n	Mean	SD	n	Mean	SD	n	Mean	SD	n	Mean	SD	n	Mean	SD	n	Mean	SD	n
100	6.2375	4	100.268	3.01028	4	96.9722	6.82496	4	26.6473	5.09336	4	84.4845	2.16973	4	8.16223	2.40058	4	88.932	7.18134	4	35.2977	10.4876	4	112.171	27.0675	4	106.474	17.0773	4	14.2768	2.86925	4	67.379	2.69152	4	97.2763	3.48476	4
Ethanol extracts E14-E25, proliferation, day 7, used in S6 fig (b)
EtOH			E-14			E-15			E-16			E-17			E-18			E-19			E-20			E-21			E-22			E-23			E-24			E-25
Mean	SD	n	Mean	SD	n	Mean	SD	n	Mean	SD	n	Mean	SD	n	Mean	SD	n	Mean	SD	n	Mean	SD	n	Mean	SD	n	Mean	SD	n	Mean	SD	n	Mean	SD	n	Mean	SD	n
100	4.58741	4	97.1966	9.77676	4	98.2337	13.435	4	6.65251	0.477001	4	78.9561	8.16854	4	10.3239	5.65353	4	81.5273	7.66002	4	17.9686	3.16728	4	93.9288	3.42652	4	93.6681	3.16213	4	5.95017	0.48549	4	34.6569	2.41143	4	89.954	3.33081	4
Ethanol extracts E01-E13, cytotoxicity, day 1, used in S7 fig (a)
Positive			EtOH			E-01			E-02			E-03			E-04			E-05			E-06			E-07			E-08			E-09			E-10			E-11			E-12			E-13
Mean	SD	n	Mean	SD	n	Mean	SD	n	Mean	SD	n	Mean	SD	n	Mean	SD	n	Mean	SD	n	Mean	SD	n	Mean	SD	n	Mean	SD	n	Mean	SD	n	Mean	SD	n	Mean	SD	n	Mean	SD	n	Mean	SD	n
0.486308	0.004231	4	0.179988	0.012691	4	0.234463	0.022609	4	0.206413	0.019742	4	0.167838	0.022193	4	0.267188	0.030409	4	0.182238	0.014079	4	0.20235	0.015196	4	0.190175	0.005129	4	0.210088	0.009655	4	0.1986	0.012388	4	0.206713	0.011021	4	0.178388	0.008659	4	0.169675	0.011317	4	0.196738	0.016133	4
Ethanol extracts E14-E25, cytotoxicity, day 1, used in S7 fig (b)
Positive			EtOH			E-14			E-15			E-16			E-17			E-18			E-19			E-20			E-21			E-22			E-23			E-24			E-25
Mean	SD	n	Mean	SD	n	Mean	SD	n	Mean	SD	n	Mean	SD	n	Mean	SD	n	Mean	SD	n	Mean	SD	n	Mean	SD	n	Mean	SD	n	Mean	SD	n	Mean	SD	n	Mean	SD	n	Mean	SD	n
0.486308	0.004231	4	0.179988	0.012691	4	0.231538	0.017222	4	0.205675	0.022495	4	0.205988	0.008167	4	0.206975	0.024497	4	0.466883	0.033191	4	0.148275	0.019344	4	0.230225	0.021254	4	0.129988	0.01787	4	0.117913	0.020623	4	0.162013	0.016387	4	0.137538	0.037213	4	0.132275	0.012677	4
[truncated: 1 more columns]
